# Supplementary material for: The Role of NOX2-Derived Reactive Oxygen Species in the Induction of Endothelin-Converting Enzyme-1 by Angiotensin II
Source: MDPI journal article supplement (doi:10.3390/antiox13040500), 2024-04-22

Suppl Fig. S1.

**The effect of NOX2-siRNA on NOX2 and GAPDH protein expression.**

HMECs were transiently transfected with NOX2-siRNA at doses indicated and then stimulated with Ang II (1  $\mu\text{mol/L}$ ) for 12 hours. The expression of NOX2 and GAPDH proteins was analyzed by Western blotting. Results of 2 independent experiments are presented on original uncropped gels and as quantified normalized data

The order of samples is as follows:

- (M) molecular weight marker;
- (1 and 7) Ang II;
- (2 and 8) Ang II + NOX2-siRNA (10 nM),
- (3 and 9) Ang II + NOX2-siRNA (1 nM),
- (4 and 10) Ang II + NOX2-siRNA (0.1 nM),
- (5 and 11) Ang II + NOX2-siRNA (0.01 nM),
- (6) Ang II + NOX2-siRNA (0.001 nM).

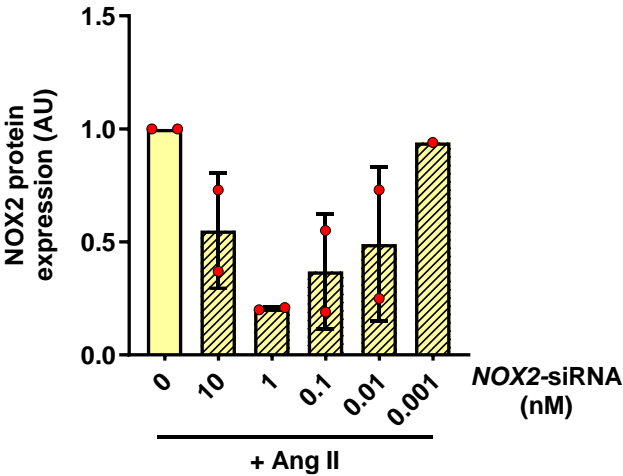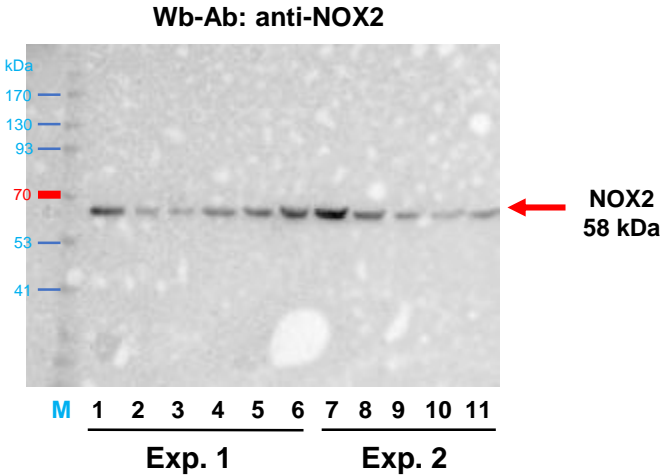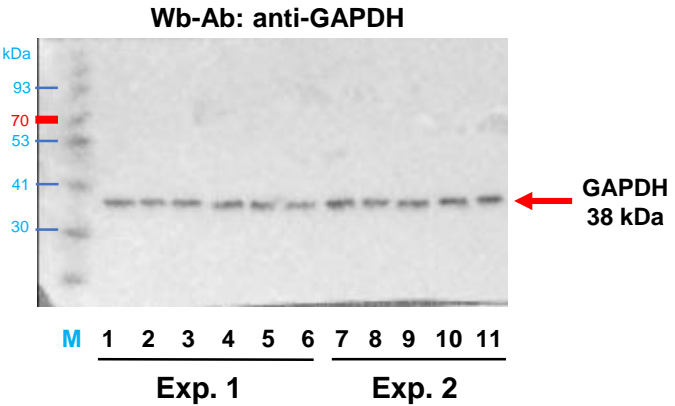

Suppl Fig. S2.

**The effect of *NOX1*- and *NOX4*-targeting siRNAs on the expression of respective mRNAs and proteins.**

HMECs were transiently transfected with *NOX1*- and *NOX4*-siRNAs at doses as indicated and then stimulated with Ang II (1  $\mu$ mol/L) for 12 hours. The expression of target mRNAs and proteins was analyzed by RT-qPCR (n=4) and Western blotting (n=2), respectively. Original uncropped gels from Western blots are presented. The order of samples was as follows: (M) molecular weight marker; (1 and 6) control; (2 and 7) Ang II; (3 and 8) Ang II + *NOX*-siRNA (0.1 nM), (4 and 9) Ang II + *NOX*-siRNA (1 nM), (5 and 10) Ang II + *NOX*-siRNA (10 nM).

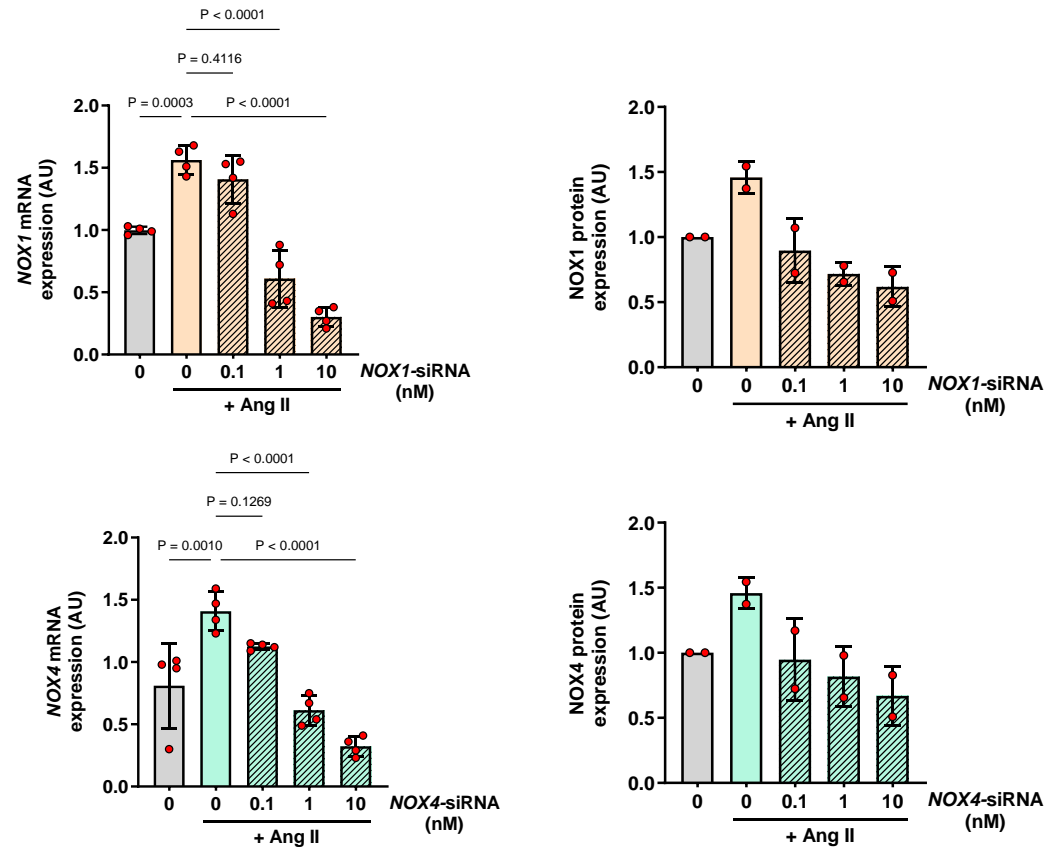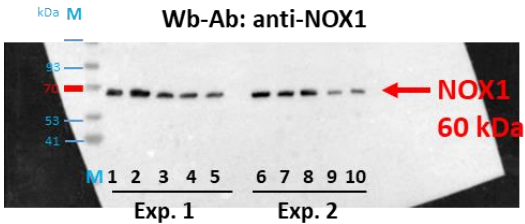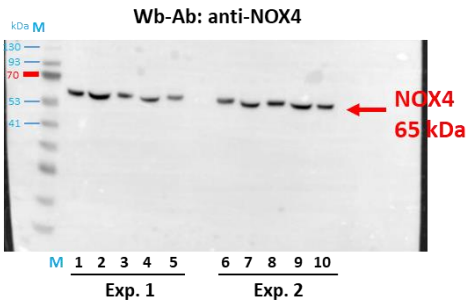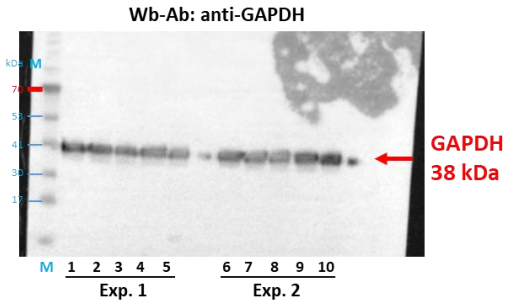

Supplement: s1 [file s1]
